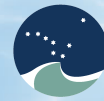

## Contribution to the Themed Section: 'Integrated assessments'

### Original Article

# Implementing ecosystem-based fisheries management: from single-species to integrated ecosystem assessment and advice for Baltic Sea fish stocks

Christian Möllmann<sup>1\*</sup>, Martin Lindegren<sup>2</sup>, Thorsten Blenckner<sup>3</sup>, Lena Bergström<sup>4</sup>, Michele Casini<sup>5</sup>, Rabea Diekmann<sup>1</sup>, Juha Flinkman<sup>6</sup>, Bärbel Müller-Karulis<sup>7</sup>, Stefan Neuenfeldt<sup>8</sup>, Jörn O. Schmidt<sup>9</sup>, Maciej Tomczak<sup>7</sup>, Rüdiger Voss<sup>9</sup>, and Anna Gårdmark<sup>4</sup>

<sup>1</sup>Institute for Hydrobiology and Fisheries Science, Center for Earth System Research and Sustainability (CEN), Klima Campus, University of Hamburg, Grosse Elbstrasse 133, D-22767 Hamburg, Germany

<sup>2</sup>Scripps Institution of Oceanography, University of California San Diego, La Jolla, CA, USA

<sup>3</sup>Stockholm Resilience Centre, Stockholm University, Kräftriket 10, SE-106 91 Stockholm, Sweden

<sup>4</sup>Department of Aquatic Resources, Institute of Coastal Research, Swedish University of Agricultural Sciences, Skolgatan 6, SE-742 22 Öregrund, Sweden

<sup>5</sup>Department of Aquatic Resources, Institute of Marine Research, Swedish University of Agricultural Sciences, PO Box 4, SE-54330 Lysekil, Sweden

<sup>6</sup>Marine Research Center, Finnish Environment Institute (SYKE), Mechelininkatu 34a, PO Box 140, FI-00251 Helsinki, Finland

<sup>7</sup>Stockholm University Baltic Sea Centre, Stockholm University, SE-106 91 Stockholm, Sweden

<sup>8</sup>Technical University of Denmark, National Institute of Aquatic Resources, Charlottenlund Castle, DK-2920 Charlottenlund, Denmark

<sup>9</sup>Department of Economics, University of Kiel, Wilhelm-Seelig-Platz 1, 24118 Kiel, Germany

\*Corresponding author: tel: +49 40 42838 6621; fax: +49 40 42838 6618; e-mail: [christian.moellmann@uni-hamburg.de](mailto:christian.moellmann@uni-hamburg.de)

Möllmann, C., Lindegren, M., Blenckner, T., Bergström, L., Casini, M., Diekmann, R., Flinkman, J., Müller-Karulis, B., Neuenfeldt, S., Schmidt, J. O., Tomczak, M., Voss, R., and Gårdmark, A. 2014. Implementing ecosystem-based fisheries management: from single-species to integrated ecosystem assessment and advice for Baltic Sea fish stocks. – ICES Journal of Marine Science, 71: 1187–1197.

Received 10 March 2013; accepted 24 June 2013; advance access publication 24 August 2013.

Theory behind ecosystem-based management (EBM) and ecosystem-based fisheries management (EBFM) is now well developed. However, the implementation of EBFM exemplified by fisheries management in Europe is still largely based on single-species assessments and ignores the wider ecosystem context and impact. The reason for the lack or slow implementation of EBM and specifically EBFM is a lack of a coherent strategy. Such a strategy is offered by recently developed integrated ecosystem assessments (IEAs), a formal synthesis tool to quantitatively analyse information on relevant natural and socio-economic factors, in relation to specified management objectives. Here, we focus on implementing the IEA approach for Baltic Sea fish stocks. We combine both tactical and strategic management aspects into a single strategy that supports the present Baltic Sea fish stock advice, conducted by the International Council for the Exploration of the Sea (ICES). We first review the state of the art in the development of IEA within the current management framework. We then outline and discuss an approach that integrates fish stock advice and IEAs for the Baltic Sea. We intentionally focus on the central Baltic Sea and its three major fish stocks cod (*Gadus morhua*), herring (*Clupea harengus*), and sprat (*Sprattus sprattus*), but emphasize that our approach may be applied to other parts and stocks of the Baltic, as well as other ocean areas.

**Keywords:** Baltic Sea, indicator approaches, integrated advice, integrated ecosystem assessment, strategic modelling.

## Introduction

Ecosystem-based management (EBM) is now a central paradigm underlying living marine resource policy worldwide. Contrary to conventional resource management approaches, EBM addresses the cumulative impacts of multiple ocean uses and climate change on multiple ecosystem components (Pikitch *et al.*, 2004; Leslie and McLeod, 2007; Marasco *et al.*, 2007). Hence, the goal of EBM is to find trade-offs between a diverse set of ecosystem services and often conflicting, management goals (McLeod and Leslie, 2009). Although the theory behind EBM is well developed, its implementation lacks behind (Berkes, 2012). A clear example is fisheries management in Europe that is still largely based on single-species assessments and ignores the wider ecosystem context and impacts. The reason for the lack or slow implementation of EBM is a lack of a coherent strategy. Such a strategy is offered by Integrated Assessment (IA). IA is commonly defined as an interdisciplinary process of combining, interpreting, and communicating knowledge from diverse scientific disciplines, in such a way that the whole set of cause–effect interactions of a problem can be evaluated from a synoptic perspective with two characteristics: (i) it should have added value compared with single disciplinary assessments and (ii) it should provide useful information to decision makers (Rotmans and Dowlatabadi, 1997; van der Sluijs, 2002).

IAs were initially developed during the 1970s, fuelled by scientific and public policy efforts to understand and control acid deposition in Europe and North America (van der Sluijs, 2002). Since the 1980s, they have played a role in the development of the international climate policy leading to, and being part of, the work of the Intergovernmental Panel on Climate Change (IPCC). In this context, IAs were largely based on IA models (IAMs), computer simulation models combining knowledge from multiple disciplines, and hence suited to analyse environmental problems in an integrated fashion (Rotmans and Dowlatabadi, 1997). Nowadays, it is widely recognized that a complete IA methodology combines IAMs with other analytical tools for integration, such as analyses of large datasets and participatory approaches.

Early developments of IAs within the field of marine living resource management were started in North America and based on analyses of large datasets showing substantial changes in ecosystem states due to climate and human impacts (Hare and Mantua, 2000; Link *et al.*, 2002; Choi *et al.*, 2005). Only recently, integrated ecosystem assessments (IEAs) have been developed as a formal synthesis tool to quantitatively analyse information on relevant natural and socio-economic factors, in relation to specified EBM objectives (Levin *et al.*, 2009). IEAs provide a strategy to overcome the still prevailing single-species and single-sector approaches; they organize science in order to inform decisions in marine EBM at multiple scales and across sectors (Levin *et al.*, 2009; Tallis *et al.*, 2010).

The goals and objectives of EBM and IEA need to be specified beforehand (Jennings, 2005; Levin *et al.*, 2009). The specified goals then define the focal components of the EBM and IEA approach (Kershner *et al.*, 2011), which may range from a specific ecosystem-based fisheries management (EBFM) to a full blown cross-sector EBM approach (Leslie and McLeod, 2007; McLeod and Leslie, 2009). Although the ambitious objectives of the European Union (EU) Marine Strategy Framework Directive (MSFD) call for a full EBM approach, fisheries management within the reformed EU Common Fisheries Policy (CFP) still relies on the development and implementation of a more sector-specific EBFM approach.

Here, we focus on the process of implementing EBFM for the Baltic Sea using elements of the IEA approach. IAs and IEAs are

generally strategic in that they explore possible future trajectories of human and natural systems under a multitude of natural and anthropogenic pressures (Weyant *et al.*, 1996; Levin *et al.*, 2009). However, present EU fisheries management requires annual stock assessment and advice. Hence, we attempt to combine both requirements into a strategy that supports the present Baltic Sea fish stock advice, conducted by the International Council for the Exploration of the Sea (ICES). We first review the state of the art in the development of EBFM and IA within the current management framework. We then outline an IEA-based approach that integrates fish stock advice and IEAs for the Baltic Sea. We intentionally focus on the central Baltic Sea and the three major fish stocks cod (*Gadus morhua*), herring (*Clupea harengus*), and sprat (*Spratus sprattus*), but emphasize that our approach may be applied to other parts and stocks of the Baltic, as well as other ocean areas.

## Elements of EBM in present operational fish stock assessment

ICES advice on total allowable catches (TACs) to the EU Commission is currently based on targets of fishing mortality at maximum sustainable yield ( $F_{MSY}$ ) and, for Eastern Baltic cod, on an EU management plan (EC, 2007; ICES, 2012a). The analytical assessments of Baltic fish stocks delivering the basis for the advice are conducted on a stock-by-stock basis. Extended survivor analysis or a state-space fish stock assessment model ([www.stockassessment.org](http://www.stockassessment.org)), both based on commercial catch-at-age data supplemented by fishery-independent survey indices, are applied to obtain estimates of key stock parameters, such as spawning-stock biomass (SSB), recruitment, and fishing mortality ( $F$ ; Shepherd, 1999; ICES, 2012b). Multispecies interactions are currently only considered for the main forage fish species, namely sprat and central Baltic herring, and for cannibalism on juvenile cod. For these stocks, predation mortality by the top predator cod is derived from multispecies assessment models (previously multispecies virtual population analysis; currently stochastic multispecies model; ICES, 2012a) and used to update the natural mortality input to the single species forage fish stock assessments.

As part of the assessment process, short-term forecasts (3 years) are conducted starting with the latest assessment year and using estimates of recruitment based on empirical spawning stock–recruitment relationships. Environmental data to inform these forecasts are only used for the herring stock in the Gulf of Riga (ICES, 2012b). Data used are the copepod *Eurytemora affinis*, the main prey for larval herring, and water temperature determining the timing and distribution of herring spawning (Cardinale *et al.*, 2009). Previously, the winter index of the North Atlantic Oscillation (NAO) and water temperature have been used in forecasts of sprat year-class strength (MacKenzie and Köster, 2004; ICES, 2006), but these are no longer used due to problems with matching environmental time-series updates with the assessment meetings.

Multispecies modelling has a long tradition for the Baltic Sea ecosystem (Sparholt, 1994; Gislason, 1999; Köster *et al.*, 2001) but has never been used fully in operational fish stock assessment (aside from providing input to single species stock assessments, see above). However recently, in response to a request by the EU commission, a multispecies assessment has been conducted as a pilot study towards implementing the ecosystem approach (ICES, 2012d; STECF, 2012). The assessment was conducted using SMS that accounts for the mortality inflicted by cod on sprat, herring, and juvenile cod. Simulations revealed all species-specific multispecies  $F_{MSY}$

to be higher than their single-species counterparts. However, particularly for cod and sprat, simulations show that higher fishing mortality will give very similar long-term yields, but result in lower SSBs and a higher risk of stock collapse. Model results further indicate that higher  $F$  on cod will result only in a minor increase in cod yield, but in higher sprat and herring yields. However, modelling of  $F_{MSY}$  currently ignores structural uncertainty such as variable predator–prey overlap and density-dependent growth. Hence, ICES (2012d) and STECF (2012) concluded that more work is needed to fully understand the results of the multispecies runs and their implications for the Baltic fish stock advice and management.

## Indicator approaches to IAs

### Integrated trend and status assessments

Despite efforts towards multispecies considerations, Baltic fish stock assessments are mostly single species, ignoring the larger ecosystem context (Casini *et al.*, 2011a). As a first step towards developing more integrative assessments, analyses on the state and development of the various Baltic ecosystems have been conducted using large multitrophic datasets (ICES, 2008; Möllmann *et al.*, 2009; Diekmann and Möllmann, 2010; Lindegren *et al.*, 2010a, 2012a). These so-called integrated trend analyses (ITAs) used multivariate statistics based on an approach developed for the North Pacific and Atlantic, as well as the North Sea ecosystems (Hare and Mantua, 2000; Link *et al.*, 2002; Choi *et al.*, 2005; Weijerman *et al.*, 2005; Kenny *et al.*, 2009; Möllmann and Diekmann, 2012). Analyses of these large datasets were conducted using dimension reduction techniques, mainly principal component analysis (PCA; e.g. Legendre and Legendre, 1998) and methodologies to identify step changes in biotic and abiotic variables, such as STARS (Rodionov, 2004) or chronological clustering (Legendre *et al.*, 1985).

Here, we present a reanalysis of data from the Central Baltic Sea using 57 annual time-series (1979–2010), in two separate PCAs on 28 biotic variables from phytoplankton to fish and 29 abiotic variables describing the physical conditions and anthropogenic driving forces such as nutrient concentrations and fishing pressure (Figure 1). Connecting biotic year scores chronologically on the first factorial plane (PC1 vs. PC2) results in a time trajectory that shows the regime shift during the late 1980s/early 1990s (Figure 1a). The change in the ecosystem is displayed by the opposition of cod and herring as well as sprat and the copepod *Acartia* spp., showing the strongest loadings on PC1 (Figure 1b). According to Möllmann *et al.* (2009), the period between 1987 and 1992 can be interpreted as a transition period, in which a major reorganization of the ecosystem occurred, due to the interaction of abrupt climatic changes, unsustainable fishing pressure and eutrophication. Our updated PCA confirms that after 1992, abiotic conditions largely returned to values similar to the initial state (Figure 1c), indicating hysteresis and stabilizing feedbacks in the foodweb (Casini *et al.*, 2009, 2010; Möllmann *et al.*, 2009). The analysis of the major abiotic loadings confirmed that a temperature increase and salinity decrease were major drivers of the central Baltic regime shift (Figure 1d). Similar major reorganizations during the late 1980s/early 1990s were found synchronously for almost all studied Baltic ecosystems (Diekmann and Möllmann, 2010; ICES, 2012c).

### Early warning indicators

Ecosystem regime shifts, like those observed in the Baltic Sea, are reported for many other marine ecosystems in the world (Möllmann and Diekmann, 2012). These large-scale

reorganizations in ecosystem structure and function bear important social and economic costs and may be difficult to reverse (Scheffer *et al.*, 2001; Suding *et al.*, 2004). Hence, management strategies that help prevent unwanted change are necessary, and these rely on indicators showing warning signs well before a transition might occur (Scheffer *et al.*, 2009). Although the theoretical foundation of early warning indicators has greatly improved (Scheffer *et al.*, 2012), the application of potential early warning indicators in real ecosystems is still very limited. Lindegren *et al.* (2012b) applied multiple early warning indicators to monitoring data of key ecosystem components of the Baltic Sea, namely the zooplankton species *Pseudocalanus acuspes* and *Acartia* spp. They demonstrated that the ability of the indicators to forewarn the major ecosystem regime shift in the central Baltic Sea is variable depending on the indicator time-series used. Hence, a multiple method approach for early detection of ecosystem regime shifts is proposed that can be useful in informing timely management actions in the face of ecosystem change (Lindegren *et al.*, 2012b).

### Indicator approach in support of single-species fish stock advice

Results and data from the above reported integrated trend and status assessments have also been used for developing a set of ecosystem indicators that can support the assessment of the stock status of individual species (Gårdmark *et al.*, 2011). Using eastern Baltic cod as a case study, they developed a set of indicators including size/age structure of the target stock, predator, and prey levels for early life-history stages and physical oceanographic conditions. Individual indicators were evaluated for showing support for or against the assessment model-derived stock status and trends. Additionally, individual indicators were combined into an ecosystem-based indicator of cod recruitment potential using fuzzy-logic networks (Jarre *et al.*, 2008). Gårdmark *et al.* (2011) thus show how to use ecosystem indicators for reducing the uncertainty in model-based estimates of stock status and for determining more precautionary harvest control rules (HCRs).

## Integrated modelling approaches

### Ecological models

Like in many other areas, fish stock assessments for the Baltic Sea use single-species fisheries models as a basis for short-term tactical setting of TAC. However, to evaluate the impact of alternative management strategies on the state and dynamics of exploited fish populations, strategic modelling approaches are essential tools. Obviously, an exploited population does not exist in isolation, and its response to a fishing pressure emerges from the feedbacks caused by its interactions with other species in the foodweb, as well as from direct and indirect effects of abiotic pressures. The essence of EBFM is to account for such foodweb mediated feedbacks and indirect effects (McLeod and Leslie, 2009). Hence, strategic modelling for EBFM involves evaluating exploitation effects in the presence of species interactions and under alternative future environments.

For the main exploited species in the central Baltic Sea, strategic modelling for EBFM has been performed using a few approaches. Lindegren *et al.* (2009) developed a stochastic multivariate autoregressive model (BALMAR) of cod, sprat, herring, and their zooplankton prey including the influence of fishing and climate variables. Such a model represents statistically derived relationships between the species, and any management impact analyses using this model (e.g. Lindegren *et al.*, 2010b) thus relies on the

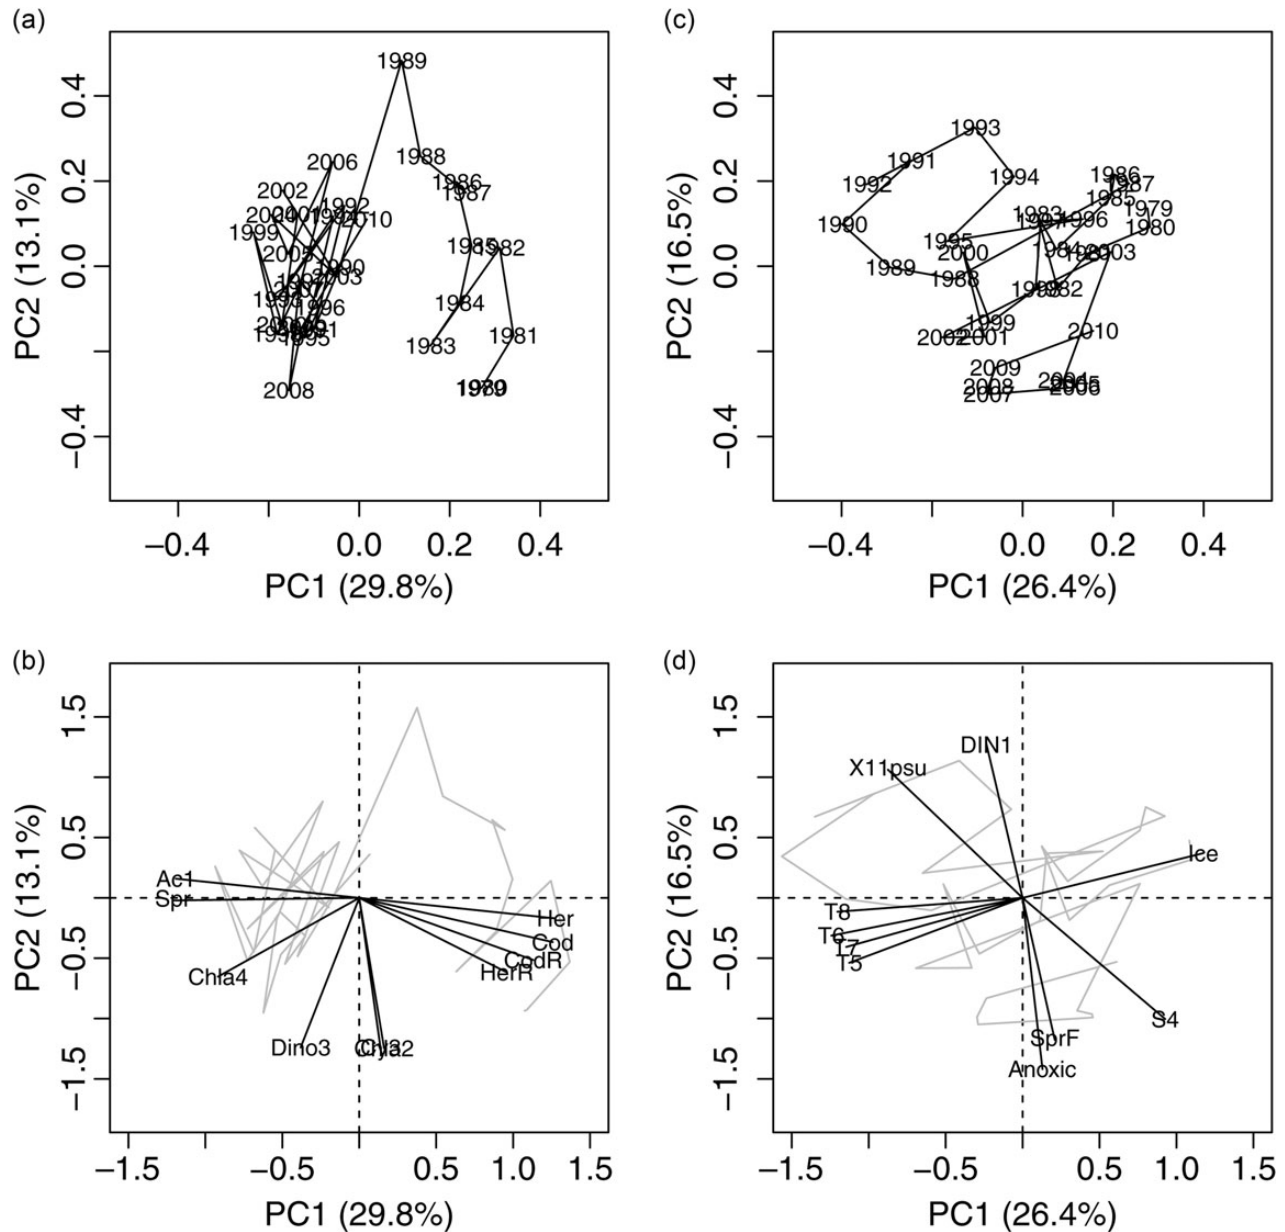

**Figure 1.** Results of an ITA for the central Baltic Sea ecosystem of biotic (a and b) and abiotic (c and d) variables. (a and c) Time trajectories of PC scores on the first factorial plane based on a normalized PCA. (b and d) Biplots showing the ten variables that were best represented on the first factorial plane (time trajectory in the background; variables and years are scaled symmetrically by square root of eigenvalues). Cod/Her/Spr, cod/herring/sprat; R, recruitment; F, fishing mortality; Ac1, *Acartia* spp. biomass; Chla 2,4, chlorophyll *a* summer concentration in Bornholm and Gotland Basin, respectively; Dino 3, dinoflagellate spring biomass in Bornholm Basin; X11psu, depth of the 11psu isohaline; T 5,6,7,8, midwater temperature in Bornholm and Gotland Basin in spring and summer, respectively; Anoxic, area with anoxic bottom water; S4, deepwater salinity in the Gotland Basin.

assumption that the species interactions (i.e. parameters) do not change outside the estimated range obtained during the period used for model fitting. An alternative is to represent trophic interactions between species in more detail as, for example, is possible with the Ecopath with Ecosim (EwE) modelling approach (Christensen and Walters, 2004). The EwE approach has been applied to the central Baltic Sea foodweb (Harvey *et al.*, 2003; Österblom *et al.*, 2007) and in its present form includes 22 functional groups (Niiranen *et al.*, 2012; Tomczak *et al.*, 2012). However, since interactions occur between individuals rather than populations, a more mechanistic approach towards modelling trophic interactions

is to explicitly model individual level processes, such as feeding (predation), metabolism, energy allocation, and resulting growth, mortality, and reproduction, as done in physiologically structured population models (Metz and Diekmann, 1986; de Roos and Persson, 2001). This type of models has been developed for the interactions between Baltic cod, sprat, and their resources (van Leeuwen *et al.*, 2008, 2013), and between herring, sprat, and their resources (Huss *et al.*, 2012), to assess qualitative responses of cod, sprat, and herring to environmental changes under alternative types of interactions. As exemplified by these three modelling approaches, available foodweb (or multispecies) models of the central Baltic

Sea differ greatly in fundamental assumptions on how to represent ecological processes. Simulated responses of exploited species and foodwebs to fishing may therefore depend on model choice.

### Biological ensemble modelling approach

To overcome the issue of model choice for impact analyses, *Gårdmark et al. (2013)* developed a biological ensemble modelling approach (BEMA), which can be used to assess the relative influence of model structure on simulated species responses, as well as to formulate fisheries management advice robust to such uncertainty. In the BEMA, a set of seven ecological models (ranging from single-species to foodweb models of varying complexity) was subjected to the same initial conditions and external forcing based on a combination of exploitation and climate change scenarios to simulate the responses of eastern Baltic cod to historically observed high fishing levels vs. fishing at management target levels, including a number of future climate change scenarios (Figure 2). The BEMA ensemble was then used to: (i) identify model assumptions causing key divergence in simulated species responses (by contrasting ensemble subsets), (ii) evaluate the relative importance of model structure uncertainty for overall uncertainty in simulated responses (by contrasting variation among models within a climate trajectory with variation within each model among all climate trajectories), and (iii) formulate robust advice for fisheries management (by identifying conclusions on management effects common for the whole ensemble). *Gårdmark et al. (2013)* demonstrated that assumptions of species interactions greatly impacted simulated cod dynamics, with models lacking stabilizing predator–prey feedbacks showing large interannual fluctuations and a greater sensitivity to the underlying uncertainty of climate forcing. Nevertheless, robust conclusions regarding the effects of alternative fishing levels could be found, e.g. in all models, intense fishing prevented recovery and climate change further decreased the cod population. Although the BEMA (*Gårdmark et al., 2013*) has so far only been applied to single-species responses, the approach is equally suitable to study indirect effects of exploitation on non-target species (*ICES, 2009*), groups of species providing particular ecosystem services, as well as indicators of environmental status (*ICES, 2012c*) as developed for the MSFD.

### Coupled ecological–economic modelling

When formulating new fishing rules, basic economic conditions for the relevant fishery are often not understood and therefore ignored. Coupled ecological–economic optimization models have been developed and analysed for Baltic cod, herring, and sprat stocks. These models are available as single-species (*Quaas et al., 2013*) or as multispecies type, i.e. accounting for cod preying upon herring and sprat (*Nieminen et al., 2012*). These models are also able to address climate change impacts by using environmentally sensitive stock–recruitment functions. Changes in optimal fishing strategy under climate change scenarios can therefore be computed (*ICES, 2010; Voss et al., 2011*). Easily understandable, well-defined indicators have proven to be especially helpful to foster transfer and application of economic analyses into “real-world” fisheries management. In this context, a new ecological–economic indicator was developed: the shadow interest rate, SIR (*Quaas et al., 2012*). The SIR extends economic concepts and considers fish stocks as natural capital stocks. Furthermore, the SIR, as a generic measure, allows quantifying and comparing the economic success or failure of fisheries management across stocks. It captures biological information on stock productivity as well as economic information and allows the trade-off of management objectives to be assessed, e.g.

maximizing economic rent, employment, and biomass extraction (*Quaas et al., 2012*).

### A future IEA strategy for Baltic fish stock advice and management

In the following section, we outline how the approaches and tools described above can be combined into an IEA strategy that facilitates the implementation of EBFM for the Baltic Sea (Figure 3). The strategy includes three components: (i) the transition from existing single-species to a multispecies stock assessment, (ii) an ecosystem assessment that integrates environmental information into the single-/multispecies assessment, and (iii) a strategic component that conducts long-term management strategy evaluation using coupled ecological and economic models. Hence, our strategy accounts for both the short-term needs of annual fish stock assessments, conducted for most of the European fish stocks, but also the long-term needs of future strategic EBM advice (Figure 3).

### Towards multispecies stock assessments

Single-species assessments are to a large degree still the basis for present day fish stock advice. However, we envisage an increasing use of multispecies assessment models in the future for a more realistic assessment of multispecies MSY reference points, population sizes relative to target levels, and TACs. Multispecies models can be applied indirectly by providing predation mortality rates to be used in single-species models (Figure 3). This procedure is already common practice for some Baltic fish stocks but should be conducted on a more regular, preferably annual, basis. Multispecies assessments may in the future replace the single-species procedures, when the implications for multispecies interactions especially for MSY calculation are sufficiently evaluated, as is recently initiated (*ICES, 2013*). Furthermore, additional effort is required for improving multispecies assessment models, e.g. with respect to implementing predator–prey feedbacks and density-dependent growth (*Gårdmark et al., 2013*) as well as the dependence of population processes on environmental conditions. Equally important are improved monitoring systems needed to account for the increased data requirements of multispecies models, especially with respect to data on predator diets and key functional groups affecting fish performance, such as zooplankton. Overall, a replacement of single- by multispecies assessments which account for key species interactions and environmental influences would be a first step towards integrated fish stock advice for the Baltic Sea.

### The importance of ecosystem assessments

Accounting for ecosystem effects of fishing, as well as effects of environmental variability on fish stock productivity is a crucial component of EBFM (*Pikitch et al., 2004*). Fish stock assessments traditionally rely on assumptions regarding stationary (equilibrium) dynamics of populations, communities, and the carrying capacity of ecosystems. However, a large body of research has shown that abrupt changes in productivity, e.g. due to climate, may occur (e.g. *Brander, 2007*), with far reaching consequences for ecosystem structure and functioning, as well as the provision of important goods and services (*Scheffer et al., 2001; Millennium Ecosystem Assessment, 2005*). The Baltic Sea, having experienced an ecosystem regime shift (*Möllmann et al., 2008*), including trophic cascading (*Casini et al., 2008; Möllmann et al., 2009*), as well as a collapse of the cod stock, clearly illustrates that changes in the environment as well as foodweb interactions need to be considered for sustainable management (*Lindgren et al., 2009*). Hence, ecosystem

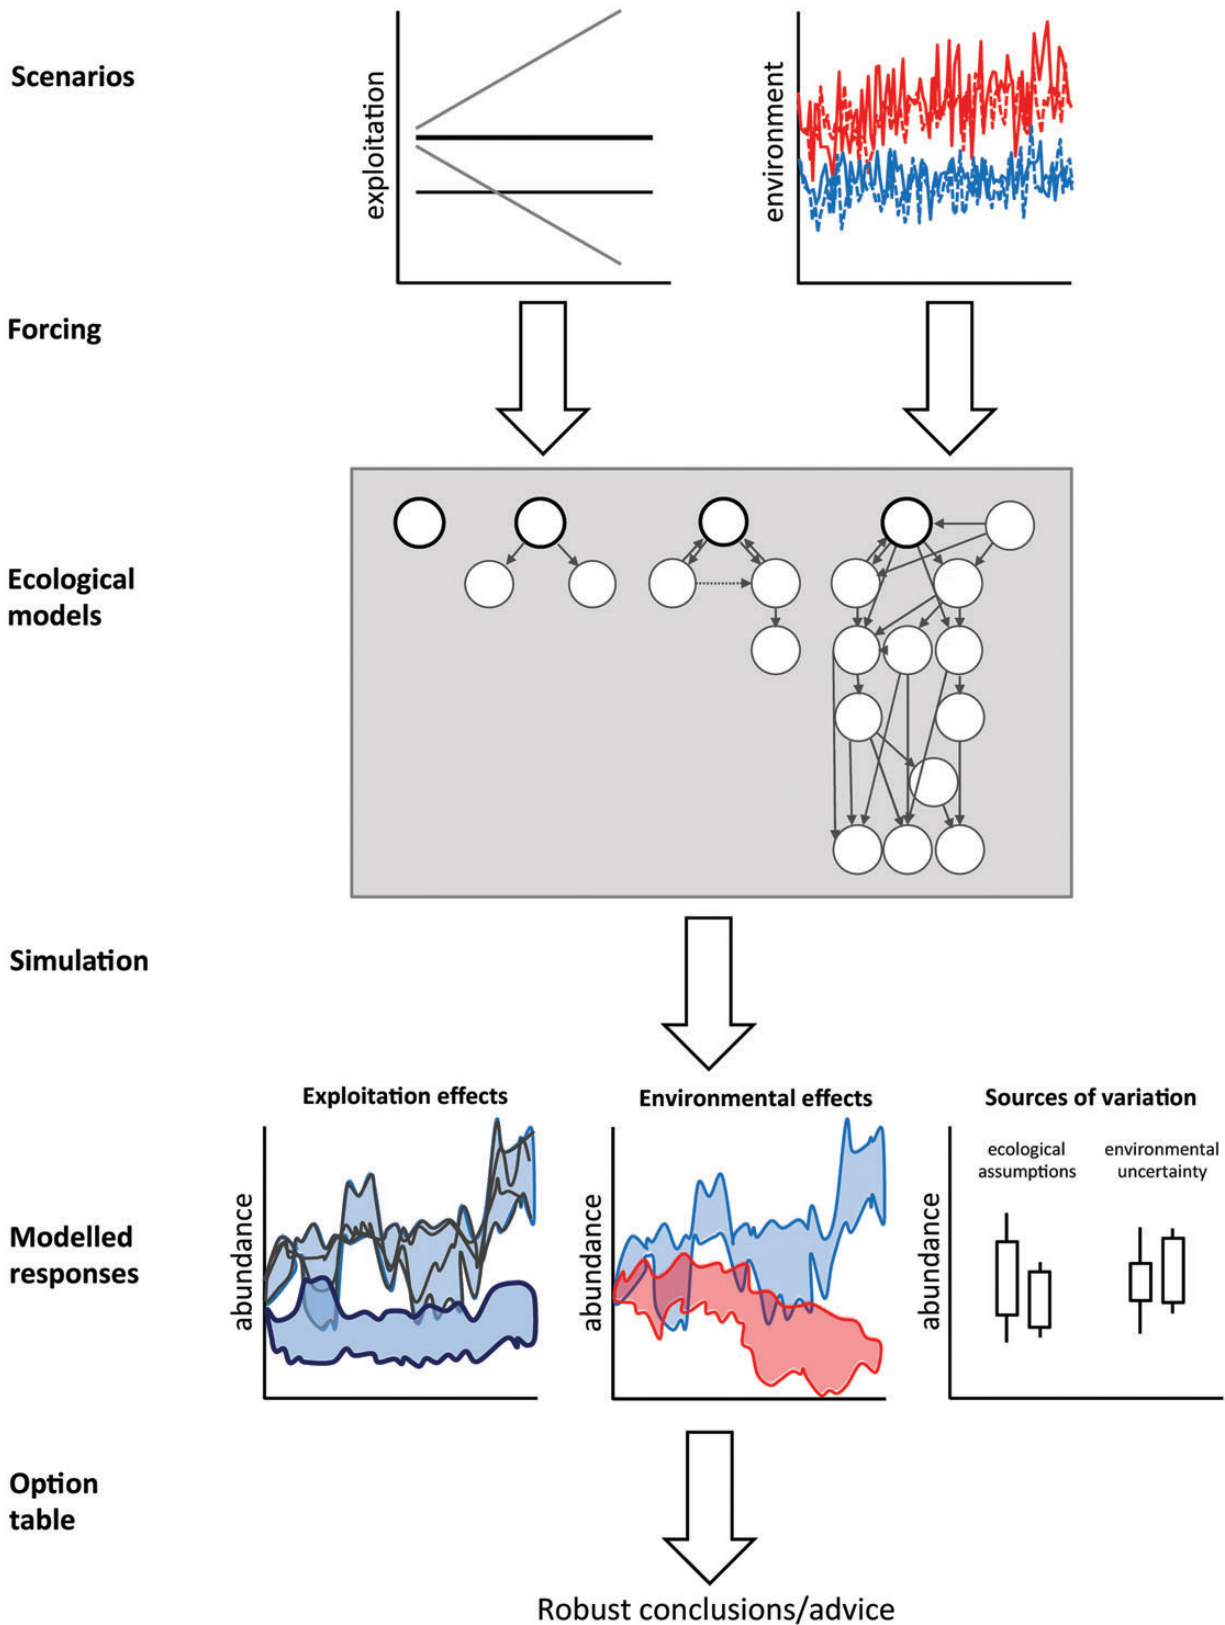

**Figure 2.** The BEMA (Gårdmark *et al.*, 2013) can be used to derive robust, strategic advice for EBFM. Combinations of management and environmental scenarios are used to force a set of ecological models of varying complexity (e.g. single species, multispecies, and foodweb models) to simulate fish stock responses to exploitation in future environments. The performance of management strategies can then be compared across (i) ecological models, (ii) environmental scenarios, and (iii) environmental variation to identify management strategies and HCRs robust to the uncertainties of ecological processes and future conditions.

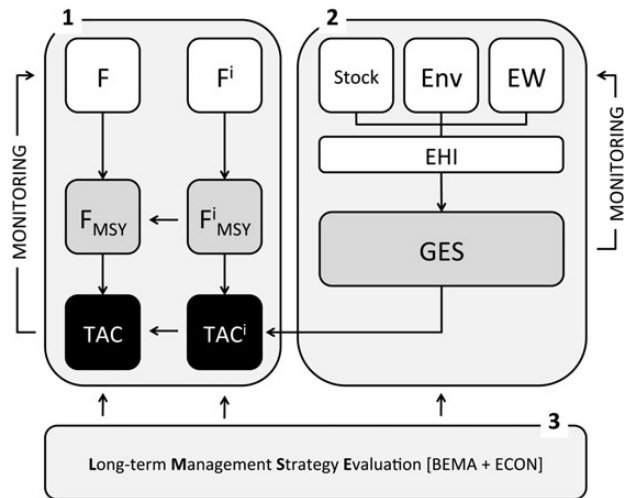

**Figure 3.** Schematic outline for a future IEA strategy for Baltic fish stock advice and management including (1) multispecies fish stock assessments, (2) ecosystem assessments, and (3) long-term management strategy evaluation: F, fishing mortality; MSY, maximum sustainable yield; TAC, total allowable catch; i, fish species, i.e. cod, herring, and sprat; stock, indicators of stock status and structure; Env, indicators on the state of the abiotic and biotic environment; EW, early warning indicators; EHI, ecosystem health index; GES, good environmental status; BEMA, biological ensemble modelling approach; ECON, coupled ecological/economical modelling.

assessments are an important component of an effective EBFM approach. For the Baltic Sea, we have identified three groups of indicators that are needed to inform fish stock assessments (Figure 3). First, indicators of stock status and structure (“Stock” in Figure 3), other than biomass and abundance, need to be considered (Gårdmark *et al.*, 2011; Eero *et al.*, 2012). These are also required by the MSFD in its “Descriptor 3” (EC, 2008) and should describe growth and recruitment of the stocks. Second, the state of the abiotic and biotic environment needs to be evaluated (“Env” in Figure 3). Gårdmark *et al.* (2011) propose indicators for the Baltic cod stock related to physical oceanographic parameters important for recruitment, as well as prey and predator effects on early life stages. Similar indicators have been identified also for the other fish stocks in the Baltic Sea (Lindegren *et al.*, 2011; Eero *et al.*, 2012). In addition, the PC-based holistic indicator from ITAs (see above) can provide important information about the ecosystem dynamics and state in a holistic way (Link *et al.*, 2002; Möllmann *et al.*, 2009). Finally, early warning indicators (“EW” in Figure 3) are important in providing timely detection of ecosystem change (Lindegren *et al.*, 2012b).

A standing difficulty of using ecosystem information in an assessment framework is to translate ecosystem indicator information into decision criteria for management (Link, 2005). A first step would be to combine individual ecosystem indicators into an ecosystem health index (EHI) (Figure 3). EHI indicates the state of the environment relative to its good environmental status (GES), a goal of many environmental policy drivers such as the MSFD (EC, 2008). A number of procedures is available for combining individual indicators, such as fuzzy logic and various weighting schemes (Gårdmark *et al.*, 2011; Ojaveer and Eero, 2011; Halpern *et al.*, 2012). Eventually, rules have to be defined that modify the HCR (i.e. rules for how the TAC shall be set depending on state in

relation to targets) according to the state of the EHI relative to GES. An example for a precautionary approach for Baltic cod is suggested by Gårdmark *et al.* (2011).

**Into the future: long-term management strategy evaluation**

The fish stock and ecosystem assessments described above primarily focus on short-term, tactical management aspects. However, environmental conditions and impacts on ecosystems and their fish stocks may vary over longer time-scales, especially in the light of expected future climate change (MacKenzie *et al.*, 2012; Meier *et al.*, 2012). Hence, strategic long-term simulations are needed to define management goals (such as  $F_{MSY}$ ) and to evaluate how robust these goals are to future climate change (Lindegren *et al.*, 2010a, b), to fishing effects on the ecosystem (Lassen *et al.*, 2013), and to our ignorance of foodweb interactions in general. In addition, Gårdmark *et al.* (2013) showed that a multimodel approach (i.e. BEMA) would be beneficial for developing management goals robust to uncertainties inherent in such simulations due to model structure and parameterization (Niiranen *et al.*, 2012). The proposed long-term management strategy evaluations will be instrumental in developing multispecies long-term management plans (STECE, 2012). Eventually, coupled ecological–economical models can be used to evaluate the economic implications of management strategies relative to environmental conditions (Voss *et al.*, 2011; Lassen *et al.*, 2013).

**Discussion**

We have proposed a strategy that integrates the present Baltic Sea single-species fish stock assessment and advice with elements of IEAs. The approach focuses on (i) integrating environmental information into the short-term tactical fish stock assessment and (ii) using existing ecological and coupled ecological–economic models in simulations to evaluate management strategies and to anticipate environmental productivity changes. The strategy is largely based on existing studies and models for the Baltic Sea and should be readily implemented and operational.

However, although many indicators for the ecosystem assessment have been proposed (e.g. Gårdmark *et al.*, 2011; Eero *et al.*, 2012), a standard set of indicators needs to be developed. Hence, indicator development is a crucial part of the IEA framework (Levin *et al.*, 2009) and should comprise (i) a formal and objective indicator selection routine, involving both scientists and stakeholders (Levin *et al.*, 2010; Kershner *et al.*, 2011), and (ii) an approach for determining target and reference levels based on time-series and ecosystem modelling (Samhuri *et al.*, 2009, 2010, 2011, 2012).

After indicator selection, a further important step in our strategy would be an analysis that identifies the risk to the indicators posed by human activities and natural processes. Risk analyses have the goal to determine the probability that an ecosystem indicator will reach or remain in an undesirable state (Levin *et al.*, 2009). Various techniques exist that use qualitative expert opinion or quantitative techniques such as statistical analyses and ecosystem modelling (Smith *et al.*, 2007; Samhuri and Levin, 2012). As demonstrated here, the necessary data and modelling tools are available to employ these techniques for the Baltic Sea ecosystem to implement this important step of IEA in the here proposed strategy.

The implementation of the outlined approach depends on the development of an integrated monitoring programme that routinely measures the selected indicators. The monitoring programme should combine the present fish stock surveys with environmental

monitoring, such as conducted by HELCOM (2011). At present, a number of key indicators are insufficiently sampled, e.g. an indicator of GES of zooplankton in relation to fish stocks (Möllmann *et al.*, 2008). Access to complex biological data, such as zooplankton and phytoplankton, is still difficult and reduced funding poses a serious threat to the important continuation of monitoring and the maintenance of long-term time-series. Furthermore, monitoring should have a wide spatial distribution at an appropriate resolution, since recent studies have shown important changes in the distributions of key species such as sprat (Casini *et al.*, 2011b) and cod (Casini *et al.*, 2012) which have important implications for management (Eero *et al.*, 2012). Eventually, regular predator stomach sampling is required for conducting reliable multispecies assessments.

The utility and implementation of the proposed approach hinges on the development of management plans that can account for the type of information that integrated fish stock advice would provide. Management plans need to include explicit rules on how TACs (and other management measures) are to be determined using information provided by, e.g. ecosystem assessments. Gårdmark *et al.* (2011) give an example how HCRs can account for uncertainty in the advice for Baltic cod, using among others ecosystem information. They suggest HCRs to be modified depending on environmental state, e.g. reflected by the EHI (Figure 3). Furthermore, harvest strategy frameworks able to deal with a broad range of information are being used in fisheries management in Australia using indicators of fishing and stock trends, combined in a hierarchical strategic approach (Smith *et al.*, 2007). The approach to long-term management strategy evaluation we propose can be instrumental in setting up these new EBM plans.

Our strategy described here implicitly demands for a resilience approach to ecosystem management (Folke *et al.*, 2004; Hughes *et al.*, 2005; Levin and Lubchenco, 2008; Fujita *et al.*, 2012). Reducing resilience of populations, communities, and foodwebs to environmental change, through anthropogenic impacts, can cause critical transitions, i.e. regime shifts, as observed in the Baltic Sea. Implementing early warning indicators and evaluating potential future scenarios accounts for a precautionary approach that ensures the health and resilience of Baltic Sea fish stocks. Furthermore, regime-based approach to EBFM can easily be implemented in our framework (King and McFarlane, 2006; Fu *et al.*, 2013; Szuwalski and Punt, 2013).

The approach developed here benefits from the relative simple three species fisheries system of the central Baltic Sea and the availability of long-term datasets and modelling approaches (Casini *et al.*, 2011a). However, our strategy can readily be applied to more complex fisheries ecosystems that usually have (i) fairly developed multispecies fisheries models (e.g. Garrison *et al.*, 2010; Howell and Bogstad, 2010; Kempf *et al.*, 2010; Link *et al.*, 2011a), (ii) long-term time-series for ecosystem assessment (Link *et al.*, 2002; Kenny *et al.*, 2009), and (iii) foodweb and ecosystem models for strategic long-term management strategy evaluation (e.g. Link *et al.*, 2011a, b; Kaplan *et al.*, 2012). Naturally the higher complexity in terms of foodweb structure and related mixed fisheries in ecosystems such as the North Sea (Ulrich *et al.*, 2012) makes ecosystem assessments and long-term modelling approaches more challenging. However, we are convinced that conducting rigorous and goal-specific indicator selection and risk assessment help overcome these challenges. The multimodel approach for strategic long-term simulations advocated here (i.e. BEMA) is less straightforward when applied to more than one target species (as in Gårdmark *et al.*, 2013) or multiple management goals, especially since foodweb

models able to address multisector use of ocean ecosystems are rare. Hence, multiple model sets are potentially needed to cover multiple goals, and rigorous management goal-specific selection criteria for model inclusion need to be developed. In general, models should be prioritized that include stabilizing predator–prey feedbacks (Gårdmark *et al.*, 2013), climate as well as anthropogenic drivers, and that allow studying indirect exploitation effects among important target and non-target species.

Eventually implementing our approach requires a fundamental change in how fish stock assessment and advice is conducted (Casini *et al.*, 2011a). More effort needs to be shifted from the regular single-species procedure towards implementing multispecies and ecosystem assessments. This potentially requires a reduction in the temporal frequency of single-species assessments, allowing more effort towards the development of ecosystem assessments. Moreover, fish stock and ecosystem assessments should be combined into an integrative, interdisciplinary framework. Within the ICES framework, the required integration of fish stock and ecosystem assessments is facilitated by the ICES SCICOM Steering Group on Regional Sea Programmes (SSGRSP) and currently supported by the planned revision of the ICES science plan, which gives the development of IEA a prominent position in the organization. But IEA implementation needs an enhanced cooperation with regional conventions such as HELCOM (Helsinki Commission) and OSPAR (Convention for the Protection of the marine Environment of the Northeast Atlantic) and related EU bodies such as STECF (Scientific, Technical, and Economic Committee for Fisheries). However, in the Baltic Sea, as well as in other areas, the data, knowledge, and tools for IEA and EBFM are readily available and should be applied and implemented without further delay.

## Acknowledgements

We thank two anonymous referees and Jason Link for comments greatly improving the manuscript. A part of the work leading to this paper was funded through the European Union Framework Seven project MYFISH (“Maximising yield of fisheries while balancing ecosystem, economic and social concerns”). The paper is to a large degree the outcome of work conducted by the “ICES/HELCOM Working Group on Integrated Assessments of the Baltic Sea (WGIAB)”. We are grateful to all past and present members of WGIAB for their support and input. We dedicate the article to the late Johan Modin, who was a supporter of WGIAB from its start.

## References

- Berkes, F. 2012. Implementing ecosystem-based management: evolution or revolution? *Fish and Fisheries*, 13: 465–476.
- Brander, K. M. 2007. Global fish production and climate change. *Proceedings of the National Academy of Sciences of the USA*, 104: 19709–19714.
- Cardinale, M., Möllmann, C., Bartolino, V., Casini, M., Kornilovs, G., Raid, T., Margonski, P., *et al.* 2009. Effect of environmental variability and spawner characteristics on the recruitment of Baltic herring *Clupea harengus* populations. *Marine Ecology Progress Series*, 388: 221–234.
- Casini, M., Bartolino, V., Molinero, J. C., and Kornilovs, G. 2010. Linking fisheries, trophic interactions and climate: threshold dynamics drive herring *Clupea harengus* growth in the central Baltic Sea. *Marine Ecology Progress Series*, 413: 241–252.
- Casini, M., Blenckner, T., Möllmann, C., Gårdmark, A., Lindegren, M., Llope, M., Kornilovs, G., *et al.* 2012. Predator transitory spillover



- induces trophic cascades in ecological sinks. *Proceedings of the National Academy of Sciences of the USA*, 109: 8185–8189.
- Casini, M., Hjelm, J., Molinero, J. C., Lövgren, J., Cardinale, M., Bartolino, V., Belgrano, A., *et al.* 2009. Trophic cascades promote threshold-like shifts in pelagic marine ecosystems. *Proceedings of the National Academy of Sciences of the USA*, 106: 197–202.
- Casini, M., Kornilovs, G., Cardinale, M., Möllmann, C., Grygiel, W., Jonsson, P., Raid, T., *et al.* 2011b. Spatial and temporal density dependence regulates the condition of central Baltic Sea clupeids: compelling evidence using an extensive international acoustic survey. *Population Ecology*, 53: 511–523.
- Casini, M., Lövgren, J., Hjelm, J., Cardinale, M., Molinero, J. C., and Kornilovs, G. 2008. Multi-level trophic cascades in a heavily exploited open marine ecosystem. *Proceedings of the Royal Society of London, Series B*, 275: 1793–1801.
- Casini, M., Möllmann, C., and Österblom, H. 2011a. Ecosystem approach to fisheries in the Baltic Sea: present and potential future applications in assessment and management. *In Ecosystem Based Management for Fisheries—an Evolving Perspective*, pp. 9–31. Ed. by A. Belgrano, and C. Fowler. Cambridge University Press, Cambridge, UK.
- Choi, J., Frank, K., Petrie, B., and Leggett, W. 2005. Integrated assessment of a large marine ecosystem: a case study of the devolution of the eastern Scotian Shelf, Canada. *Oceanography and Marine Biology: an Annual Review*, 43: 47–67.
- Christensen, V., and Walters, C. J. 2004. Ecopath with Ecosim: methods, capabilities and limitations. *Ecological Modelling*, 172: 109–139.
- de Roos, A. M., and Persson, L. 2001. Physiologically structured models—from versatile technique to ecological theory. *Oikos*, 94: 51–71.
- Diekmann, R., and Möllmann, C. (Eds) 2010. Integrated ecosystem assessments of seven Baltic Sea areas. ICES Cooperative Research Report, 302. 90 pp.
- Diekmann, R., Otto, S., and Möllmann, C. 2012. Towards Integrated Ecosystem Assessments (IEAs) of the Baltic Sea—investigating ecosystem state and historical development. *In Climate Impacts on the Baltic Sea: From Science to Policy*, 1st edn. Ed. by M. Reckermann, K. Brander, B. R. MacKenzie, and A. Omstedt. Springer. 260 pp. Heidelberg, Germany.
- EC (European Commission). 2007. Council Regulation (EC) No. 1098/2007 establishing a multi-annual plan for the cod stocks in the Baltic Sea and the fisheries exploiting those stocks, amending Regulation (EC) No 2847/93 and repealing Regulation (EC) No 779/97.
- EC (European Commission). 2008. Directive 2008/56/EC of the European Parliament and of the Council of 17 June 2008 establishing a framework for community action in the field of marine environmental policy (Marine Strategy Framework Directive).
- Eero, M., Lindegren, M., and Köster, F. W. 2012. The state and relative importance of drivers of fish population dynamics: an indicator-based approach. *Ecological Indicators*, 15: 248–252.
- Folke, C., Carpenter, S. R., Walker, B. H., Scheffer, M., Elmqvist, T., Gunderson, L. H., and Holling, C. S. 2004. Regime shifts, resilience and biodiversity in ecosystem management. *Annual Review in Ecology, Evolution and Systematics*, 35: 557–581.
- Fu, C., Perry, R.I., Shin, Y.-J., Schweigert, J., and Liu, H. 2013. An ecosystem modelling framework for incorporating climate regime shifts into fisheries management. *Progress in Oceanography*, doi:10.1016/j.pocean.2013.03.003.
- Fujita, R., Moxley, J. H., DeBey, H., Van Leuvan, T., Leumer, A., Honey, K., Aguilera, S., *et al.* 2012. Managing for a resilient ocean. *Marine Policy*, doi:10.1016/j.marpol.2012.05.025
- Gårdmark, A., Nielsen, A., Floeter, J., and Möllmann, C. 2011. Depleted marine fish stocks and ecosystem-based management: on the road to recovery, we need to be precautionary. *ICES Journal of Marine Science*, 68: 212–220.
- Gårdmark, M., Lindegren, M., Neuenfeldt, S., Blenckner, T., Heikinheimo, O., Müller-Karulis, B., Niiranen, S., *et al.* 2013. Biological ensemble modelling to evaluate potential futures of living marine resources. *Ecological Applications*, 23: 742–754.
- Garrison, L. P., Link, J. S., Cieri, M., Kilduff, P., Sharov, A., Vaughan, D., Muffley, B., *et al.* 2010. An expansion of the MSVPA approach for quantifying predator–prey interactions in exploited fish communities. *ICES Journal of Marine Science*, 67: 856–870.
- Gislason, H. 1999. Single and multispecies reference points for Baltic fish stocks. *ICES Journal of Marine Science*, 56: 571–583.
- Halpern, B. S., Longo, C., Hardy, D., McLeod, K. L., Samhouri, J. F., Katona, S. K., Kleisner, K., *et al.* 2012. An index to assess the health and benefits of the global ocean. *Nature*, 488: 615–622.
- Hare, S. R., and Mantua, N. J. 2000. Empirical evidence for North Pacific regime shifts in 1977 and 1989. *Progress in Oceanography*, 47: 103–145.
- Harvey, C. J., Cox, S. P., Essington, T. E., Hansson, S., and Kitchell, J. F. 2003. An ecosystem model of food-web and fisheries interactions in the Baltic Sea. *ICES Journal of Marine Science*, 60: 939–950.
- HELCOM. 2011. HELCOM Activities 2011 Overview (Baltic Sea Environment Proceedings No. 132). Published by the Helsinki Commission.
- Howell, D., and Bogstad, B. 2010. A combined Gadget/FLR model for management strategy evaluations of the Barents Sea Fisheries. *ICES Journal of Marine Science*, 67: 1998–2004.
- Hughes, T. P., Bellwood, D. R., Folke, C., Steneck, R. S., and Wilson, J. 2005. New paradigms for supporting the resilience of marine ecosystems. *Trends in Ecology and Evolution*, 20: 380–386.
- Huss, M., Gårdmark, A., van Leeuwen, A., and de Roos, A. M. 2012. Size- and food-dependent growth drives patterns of competitive dominance along productivity gradients. *Ecology*, 93: 847–857.
- ICES. 2006. Report of the Baltic Fisheries Assessment Working Group (WGBFAS). ICES Document CM 2006/ACFM: 24.
- ICES. 2008. Report of the ICES/HELCOM Working Group on Integrated Assessment of the Baltic Sea (WGIAB). ICES Document CM 2008/BCC: 4.
- ICES. 2009. Report of the ICES/HELCOM Working Group on Integrated Assessments of the Baltic Sea (WGIAB). ICES Document CM 2009/BCC: 2.
- ICES. 2010. Workshop on including socio-economic considerations into the climate-recruitment framework developed for clupeids in the Baltic Sea (WKSECRET). ICES Document CM 2010/SSGRSP: 9.
- ICES. 2012a. International Council for the Exploration of the Sea. Advice 2012, Book 8.
- ICES. 2012b. Report of the Baltic Fisheries Assessment Working Group (WGBFAS). ICES Document CM 2012/ACOM: 10.
- ICES. 2012c. Report of the ICES/HELCOM Working Group on Integrated Assessment of the Baltic Sea (WGIAB). ICES Document CM 2012/SSGRSP: 2.
- ICES. 2012d. Report of the Workshop on Integrated/Multispecies Advice for Baltic Fisheries (WKMULTBAL). ICES Document CM 2012/ACOM: 43.
- ICES. 2013. Report of the Benchmark Workshop on Baltic Multispecies Assessments (WKBALT). ICES Document CM 2013/in press.
- Jarre, A., Paterson, B., Moloney, C. L., Miller, D. C. M., Field, J. G., and Starfield, A. M. 2008. Knowledge-based systems as decision support tools in an ecosystem approach to fisheries: comparing a fuzzy-logic and a rule-based approach. *Progress in Oceanography*, 79: 390–400.
- Jennings, S. 2005. Indicators to support an ecosystem approach to fisheries. *Fish and Fisheries*, 6: 212–232.
- Kaplan, I. C., Horne, P. J., and Levin, P. S. 2012. Screening California Current fishery management scenarios using the Atlantis end-to-end ecosystem model. *Progress in Oceanography*, 102: 5–18.
- Kempf, A., Dingsør, G. E., Huse, G., Vinther, M., Floeter, J., and Temming, A. 2010. The importance of predator–prey overlap: predicting North Sea cod recovery with a multispecies assessment model. *ICES Journal of Marine Science*, 67: 1989–1997.

- Kenny, A., Skjoldal, H., Engelhard, G., Kershaw, P., and Reid, J. 2009. An integrated approach for assessing the relative significance of human pressures and environmental forcing on the status of large marine ecosystems. *Progress in Oceanography*, 51: 132–148.
- Kershner, J., Samhoury, J. F., James, C. A., and Levin, P. S. 2011. Selecting Indicator Portfolios for Marine Species and Food Webs: a Puget Sound Case Study. *PLoS One*, 6: e25248. doi:10.1371/journal.pone.0025248.
- King, J. R., and McFarlane, G. A. 2006. A framework for incorporating climate regime shifts into the management of marine resources. *Fisheries Management and Ecology*, 13: 93–102.
- Köster, F., Möllmann, C., Neuenfeldt, S., St. John, M., Plikshs, M., and Voss, R. 2001. Developing Baltic cod recruitment models. I. Resolving spatial and temporal dynamics of spawning stock and recruitment for cod, herring, and sprat. *Canadian Journal of Fisheries and Aquatic Sciences*, 58: 1516–1533.
- Lassen, H., Pedersen, S. A., Frost, H., and Hoff, A. 2013. Fishery management advice with ecosystem considerations. *ICES Journal of Marine Science*, 70: 471–479.
- Legendre, P., Dallot, S., and Legendre, L. 1985. Succession of species within a community: chronological clustering, with applications to marine and freshwater zooplankton. *American Naturalist*, 125: 257–298.
- Legendre, P., and Legendre, L. 1998. *Numerical ecology*, 2nd edn. Elsevier, Amsterdam, The Netherlands.
- Leslie, H. M., and McLeod, K. L. 2007. Confronting the challenges of implementing marine ecosystem-based management. *Frontiers in Ecology and the Environment*, 5: 540–548.
- Levin, P. S., Damon, I. A., and Samhoury, J. F. 2010. Developing meaningful marine ecosystem indicators in the face of a changing climate. *Standford Journal of Law, Science and Policy*, 2: 36–48.
- Levin, P. S., Fogarty, M. J., Murawski, S. A., and Fluharty, D. 2009. Integrated ecosystem assessments: developing the scientific basis for ecosystem-based management of the ocean. *PLoS Biology*, 7: e14. doi:10.1371/journal.pbio.1000014.
- Levin, S. A., and Lubchenco, J. 2008. Resilience, robustness, and marine ecosystem-based management. *Bioscience*, 58: 27–32.
- Lindgren, M., Blenckner, T., and Stenseth, N. C. 2012a. Nutrient reduction and climate change cause a potential shift from pelagic to benthic pathways in a eutrophic marine ecosystem. *Global Change Biology*, 18: 3491–3503.
- Lindgren, M., Dakos, V., Gröger, J. P., Gårdmark, A., Kornilovs, G., Otto, S. A., and Möllmann, C. 2012b. Early detection of ecosystem regime shifts: a multiple method evaluation for management application. *PLoS One*, 7: e38410.
- Lindgren, M., Diekmann, R., and Möllmann, C. 2010a. Regime shifts, resilience and recovery of a cod stock. *Marine Ecology Progress Series*, 402: 239–253.
- Lindgren, M., Möllmann, C., Nielsen, A., Brander, K., MacKenzie, B., and Stenseth, N. C. 2010b. Ecological forecasting under climate change: the case of Baltic cod. *Proceedings of the Royal Society of London, Series B: Biological Sciences*, 277: 2121–2130.
- Lindgren, M., Möllmann, C., Nielsen, A., and Stenseth, N. C. 2009. Preventing the collapse of the Baltic cod stock through an ecosystem-based management approach. *Proceedings of the National Academy of Sciences of the USA*, 106: 14722–14727.
- Lindgren, M., Östman, O., and Gårdmark, A. 2011. Interacting trophic forcing and the population dynamics of herring. *Ecology*, 92: 1407–1413.
- Link, J. S. 2005. Translating ecosystem indicators into decision criteria. *ICES Journal of Marine Science*, 62: 569–576.
- Link, J. S., Brodziak, J., Edwards, S., Overholtz, W., Mountain, D., Jossi, J., Smith, T., et al. 2002. Marine ecosystem assessment in a fisheries management context. *Canadian Journal of Fisheries and Aquatic Sciences*, 59: 1429–1440.
- Link, J. S., Gamble, R. J., and Fogarty, M. J. 2011a. An overview of the NEFSC's ecosystem modeling enterprise for the Northeast US Shelf Large Marine Ecosystem: towards ecosystem-based fisheries management. US Department of Commerce, Northeast Fisheries Science Center Reference Document 11-23. 89 pp.
- Link, J. S., Gamble, R. J., and Fulton, E. A. 2011b. NEUS—Atlantis: construction, calibration, and application of an ecosystem model with ecological interactions, physiographic conditions, and fleet behavior. NOAA Technical Memorandum, NMFS NE-218. National Marine Fisheries Service, Woods Hole, MA. 247 pp. <http://www.nefsc.noaa.gov/nefsc/publications/>.
- MacKenzie, B., and Köster, F. 2004. Fish production and climate: sprat in the Baltic Sea. *Ecology*, 85: 784–794.
- MacKenzie, B. R., Meier, H. E. M., Lindegren, M., Neuenfeldt, S., Eero, M., Blenckner, T., Tomczak, T., et al. 2012. Impact of climate change on fish population dynamics in the Baltic Sea: a dynamical downscaling investigation. *Ambio*, 41: 626–636.
- Marasco, R. J., Goodman, D., Grimes, C. B., Lawson, P. W., Punt, A. E., and Quin, T. J. 2007. Ecosystem-based fisheries management: some practical suggestions. *Canadian Journal of Fisheries and Aquatic Sciences*, 64: 928–939.
- McLeod, K. L., and Leslie, H. M. (Eds) 2009. *Ecosystem-Based Management for the Oceans*. Island Press, Washington, DC.
- Meier, H. E. M., Andersson, H. C., Arheimer, B., Blenckner, T., Chubarenko, B., Donnelly, C., Eilola, K., et al. 2012. Comparing reconstructed past variations and future projections of the Baltic Sea ecosystem—first results from multi-model ensemble simulations. *Environmental Research Letters*, 7: 034005.
- Metz, J. A. J., and Diekmann, O. 1986. Formulating models for structured populations. *In The Dynamics of Physiologically Structured Populations* (Amsterdam, 1983), Volume 68 of Lecture Notes in Biomath, pp. 78–135. Springer, Berlin.
- Millennium Ecosystem Assessment. 2005. *Ecosystems and Human Wellbeing: Synthesis*. Island Press, Washington, DC.
- Möllmann, C., and Diekmann, R. 2012. Marine ecosystem regime shifts induced by climate and overfishing—a review for the Northern hemisphere. *Advances in Ecological Research*, 47: 303–347.
- Möllmann, C., Diekmann, R., Müller-Karulis, B., Kornilovs, G., Plikshs, M., and Axe, P. 2009. Reorganization of a large marine ecosystem due to atmospheric and anthropogenic pressure: a discontinuous regime shift in the Central Baltic Sea. *Global Change Biology*, 15: 1377–1393.
- Möllmann, C., Müller-Karulis, B., Kornilovs, G., and St. John, M. 2008. Effects of climate and overfishing on zooplankton dynamics and ecosystem structure: regime shifts, trophic cascade, and feedback loops in a simple ecosystem. *ICES Journal of Marine Science*, 65: 302–310.
- Niemenen, E., Lindroos, M., and Heikinheimo, O. 2012. Optimal bio-economic multispecies fisheries management: a Baltic Sea case study. *Marine Resource Economics*, 27: 115–136.
- Niiranen, S., Blenckner, T., Hjerne, O., and Tomczak, M. T. 2012. Uncertainties in a Baltic Sea food-web model reveal challenges for future projections. *Ambio*, 421: 613–625.
- Ojaveer, H., and Eero, M. 2011. Methodological challenges in assessing the environmental status of a marine ecosystem: case study of the Baltic Sea. *PLoS One*, 6: e19231. doi:10.1371/journal.pone.0019231
- Österblom, H., Hansson, S., Larsson, U., Hjerne, O., Wulff, F., Elmgren, R., and Folke, C. 2007. Human-induced trophic cascades and ecological regime shifts in the Baltic Sea. *Ecosystems*, 10: 877–889.
- Pikitch, E. K., Santora, C., Babcock, E. A., Bakun, A., Bonfil, R., Conover, D. O., Dayton, P., et al. 2004. Ecosystem-based fishery management. *Science*, 305: 346–347.
- Quaas, M. F., Froese, R., Herwartz, H., Requate, T., Schmidt, J. O., and Voss, R. 2012. Fishing industry borrows from natural capital at high shadow interest rates. *Ecological Economics*, 82: 45–52.
- Quaas, M. F., Requate, T., Ruckes, K., Skonhofs, A., Vestergaard, N., and Voss, R. 2013. Incentives for optimal management of age-structured fish populations. *Resource and Energy Economics*, 35: 113–134.
- Rodionov, S. N. 2004. A sequential algorithm for testing climate regime shifts. *Geophysical Research Letters*, 31: L09204.

- Rotmans, J., and Dowlatabadi, H. 1997. Integrated assessment of climate change: evaluation of methods and strategies. *In* Human Choice and Climate Change: an International Social Science Assessment. Ed. by S. Rayner, and E. Malone. Battelle Press, Washington, USA.
- Samhouri, J. F., Lester, S. E., Selig, E. R., Halpern, B. S., Fogarty, M. J., Longo, C., and McLeod, K. E. 2012. Sea sick? Setting targets to assess ocean health and ecosystem services. *Ecosphere*, 3: 1–18.
- Samhouri, J. F., and Levin, P. S. 2012. Linking land- and sea-based activities to risk in coastal ecosystems. *Biological Conservation*, 145: 118–129.
- Samhouri, J. F., Levin, P. S., and Ainsworth, C. H. 2010. Identifying thresholds for ecosystem-based management. *PLoS One*, 5: e8907.
- Samhouri, J. F., Levin, P. S., and Harvey, C. J. 2009. Quantitative evaluation of marine ecosystem indicator performance using food web models. *Ecosystems*, 12: 1283–1298.
- Samhouri, J. F., Levin, P. S., James, A., Kershner, J., and Williams, G. 2011. Using existing scientific capacity to set targets for ecosystem-based management: a Puget Sound case study. *Marine Policy*, 35: 508–518.
- Scheffer, M., Bascompte, J., Brock, W., Brovkin, V., Carpenter, S., Dakos, V., Held, H., *et al.* 2009. Early-warning signals for critical transitions. *Nature*, 461: 53–59.
- Scheffer, M., Carpenter, S., Foley, J. A., Folke, C., and Walker, B. 2001. Catastrophic shifts in ecosystems. *Nature*, 413: 591–596.
- Scheffer, M., Carpenter, S. R., Lenton, T. M., Bascompte, J., Brock, W., Dakos, V., van de Koppel, J., *et al.* 2012. Anticipating critical transitions. *Nature*, 338: 344–348.
- Shepherd, J. G. 1999. Extended survivors analysis: an improved method for the analysis of catch-at-age data and abundance indices. *ICES Journal of Marine Science*, 56: 584–591.
- Smith, A. D. M., Fulton, E. J., Hobday, A. J., Smith, D. C., and Shoulder, P. 2007. Scientific tools to support the practical implementation of ecosystem-based fisheries management. *ICES Journal of Marine Science*, 64: 633–639.
- Sparholt, H. 1994. Fish species interactions in the Baltic Sea. *Dana*, 10: 131–162.
- STECF. 2012. Scientific, Technical and Economic Committee for Fisheries (STECF). Multispecies Management Plans for the Baltic (STECF-12-06).
- Suding, K., Gross, K., and Houseman, G. 2004. Alternative states and positive feedbacks in restoration ecology. *Trends in Ecology and Evolution*, 19: 46–53.
- Szuwalski, C. S., and Punt, A. E. 2013. Fisheries management for regime-based ecosystems: a management strategy evaluation for the snow crab fishery in the eastern Bering Sea. *ICES Journal of Marine Science*, 70: 955–967.
- Tallis, H., Levin, P. S., Ruckelshaus, M., Lester, S. E., McLeod, K. L., Fluharty, D. L., and Halpern, B. S. 2010. The many faces of ecosystem-based management: making the process work today in real places. *Marine Policy*, 34: 340–348.
- Tomczak, M. T., Niiranen, S., Hjerne, O., and Blenckner, T. 2012. Ecosystem flow dynamics in the Baltic Proper—using a multitrophic dataset as a basis for foodweb modelling. *Ecological Modelling*, 230: 123–147.
- Ulrich, C., Wilson, D. C. K., Nielsen, J. R., Bastardiea, F., Reeves, S. A., Andersen, B. S., and Eigaard, O. R. 2012. Challenges and opportunities for fleet- and métier-based approaches for fisheries management under the European Common Fishery Policy. *Ocean and Coastal Management*, 70: 38–47.
- van der Sluijs, J. P. 2002. Integrated assessment. *In* Encyclopedia of Global Environmental Change, 4, pp. 250–253. Ed. by R. E. Munn. Wiley, Chichester.
- van Leeuwen, A., De Roos, A. M., and Persson, L. 2008. How cod shapes its world. *Journal of Sea Research*, 60: 89–104.
- van Leeuwen, A., Huss, M., Gårdmark, A., Casini, M., Vitale, F., Hjelm, J., Persson, L., *et al.* 2013. Predators with multiple ontogenetic niche shifts have limited potential for population growth and top-down control of their prey. *American Naturalist*, 182: 53–66.
- Voss, R., Hinrichsen, H.-H., Quaas, M. F., Schmidt, J., and Tahvonen, O. 2011. Temperature change and Baltic sprat: from observations to ecological-economic modeling. *ICES Journal of Marine Science*, 68: 1244–1256.
- Weijerman, M., Lindeboom, H., and Zuur, A. 2005. Regime shifts in marine ecosystems of the North Sea and Wadden Sea. *Marine Ecology Progress Series*, 298: 21–39.
- Weyant, J., Davidson, O., Dowlatabadi, H., Edmonds, J., Grubb, M., Richels, R., Rotmans, J., *et al.* 1996. Integrated assessment of climate change: an overview and comparison of approaches and results. *In* Climate Change 1995–Economic and Social Dimensions of Climate Change. Contribution of Working Group III to the Second Assessment Report of the Intergovernmental Panel on Climate Change (IPCC). Ed. by J. P. Bruce, H. Lee, and E. F. Haites. Cambridge University Press, Cambridge.

Handling editor: Jason Link
